# Supplementary material
Source: PubMed Central journal article supplement (PMC8983569)

Supplemental Figure 1. Tail vein CT26-Luc tumor cell injection results in lung metastases in all injected mice

Weeks Following Injection    500,000 CT26-Luc Cells Injected

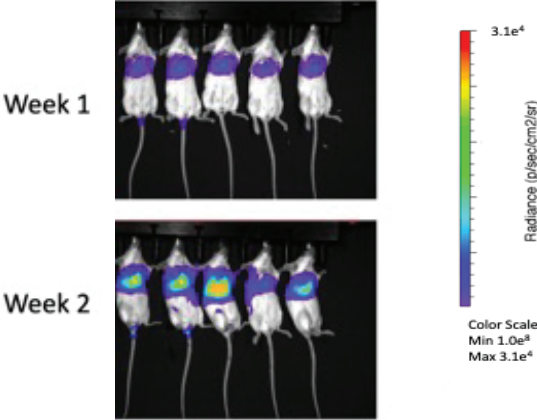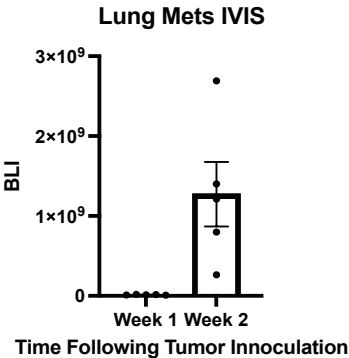

Supplemental Figure 2. CD4+ and CD8+ T cell populations depleted in experimental groups

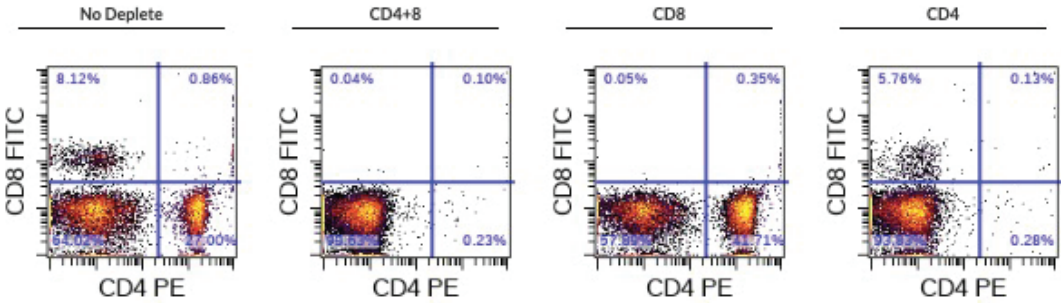

Supplemental Figure 3. Local disease burden in neoadjuvant, resection and untreated groups in 4T1-Luc tumor model

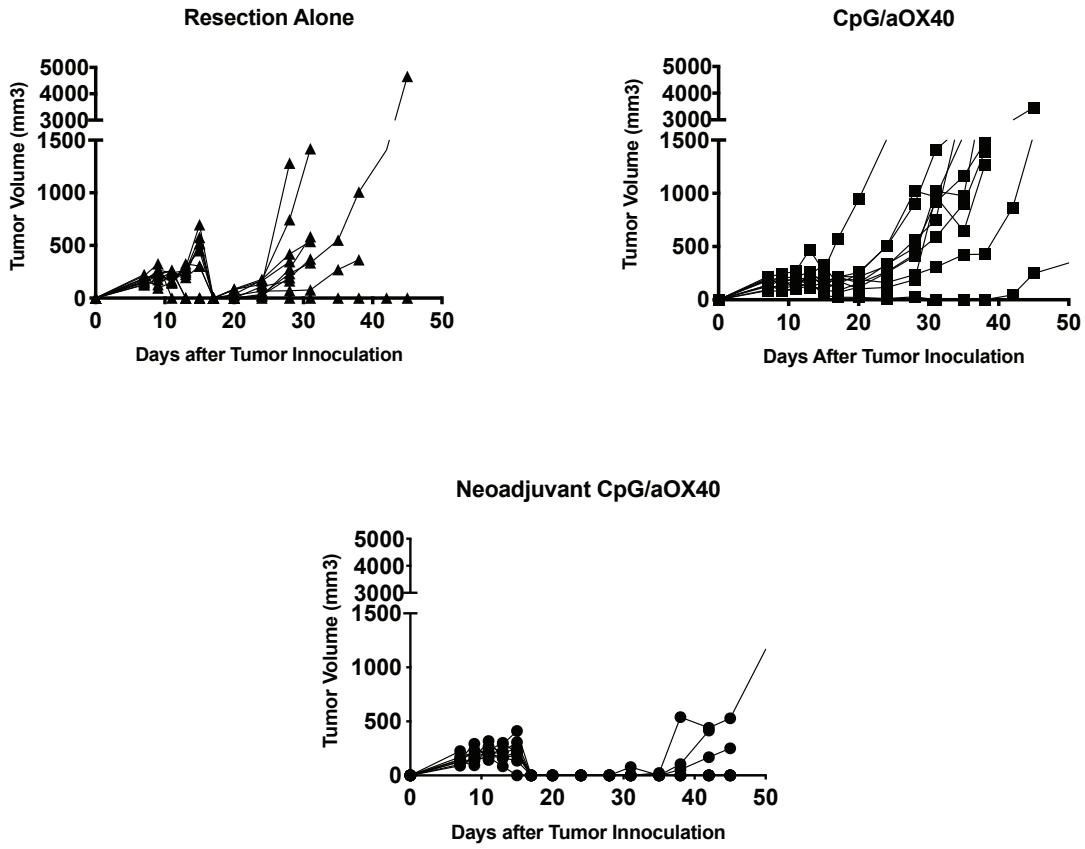

## Activated splenocytes

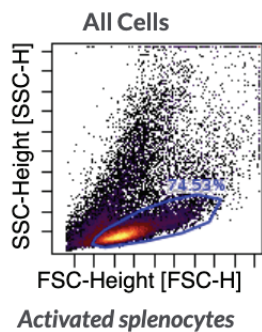

## CD8+

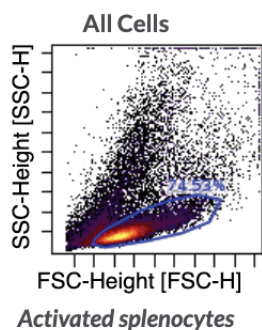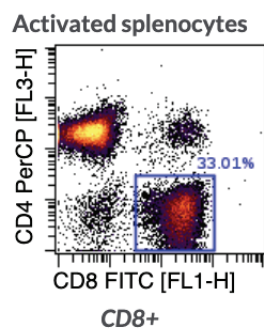

## IFN-gamma positive UR

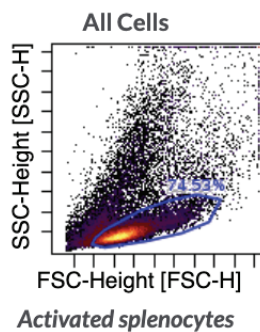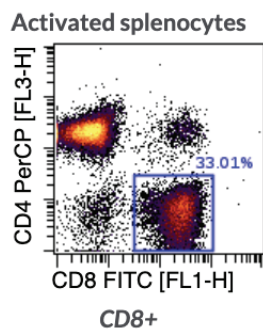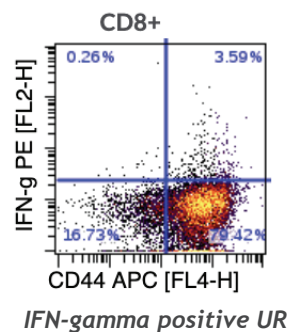

Supplemental Figure 5. Monotherapy tumor microenvironment comparison

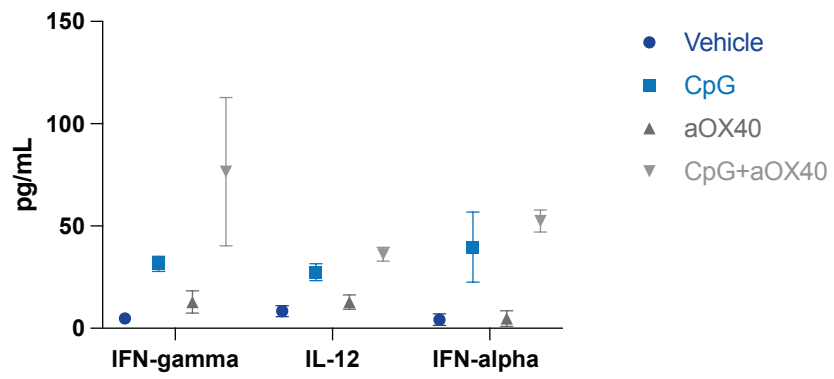

Supplement: NIHMS1780675-supplement-1.pdf [file NIHMS1780675-supplement-1.pdf]
